# Supplementary material for: Assessing the impact of climate change to landslides using public data, a case study from Vejle, Denmark
Source: Copernicus journal article supplement (doi:10.5194/nhess-2023-68), 2023-05-16
Supplement: Supplementary file [file nhess-2023-68-AC3-supplement.pdf]

| <b>Comment</b>                                                                                                                                     | <b>Answer</b>                                      |
|----------------------------------------------------------------------------------------------------------------------------------------------------|----------------------------------------------------|
| <b>Daniel Ben-Yehoshua, Referee #3</b>                                                                                                             |                                                    |
| Overall, I believe that the manuscript fulfills the journal's scientific standards and I recommend accepting this manuscript with minor revisions. | We thank the reviewer for the positive review.     |
| <b>Technical corrections</b> (See pdf)                                                                                                             | We will amend the technical corrections suggested. |
